# Supplementary material for: Radiological and Molecular Analysis of Radioiodinated Anastrozole and Epirubicin as Innovative Radiopharmaceuticals Targeting Methylenetetrahydrofolate Dehydrogenase 2 in Solid Tumors
Source: MDPI journal article supplement (doi:10.3390/pharmaceutics16050616), 2024-05-03
Supplement: s1 [file s1]

## Supplementary Materials

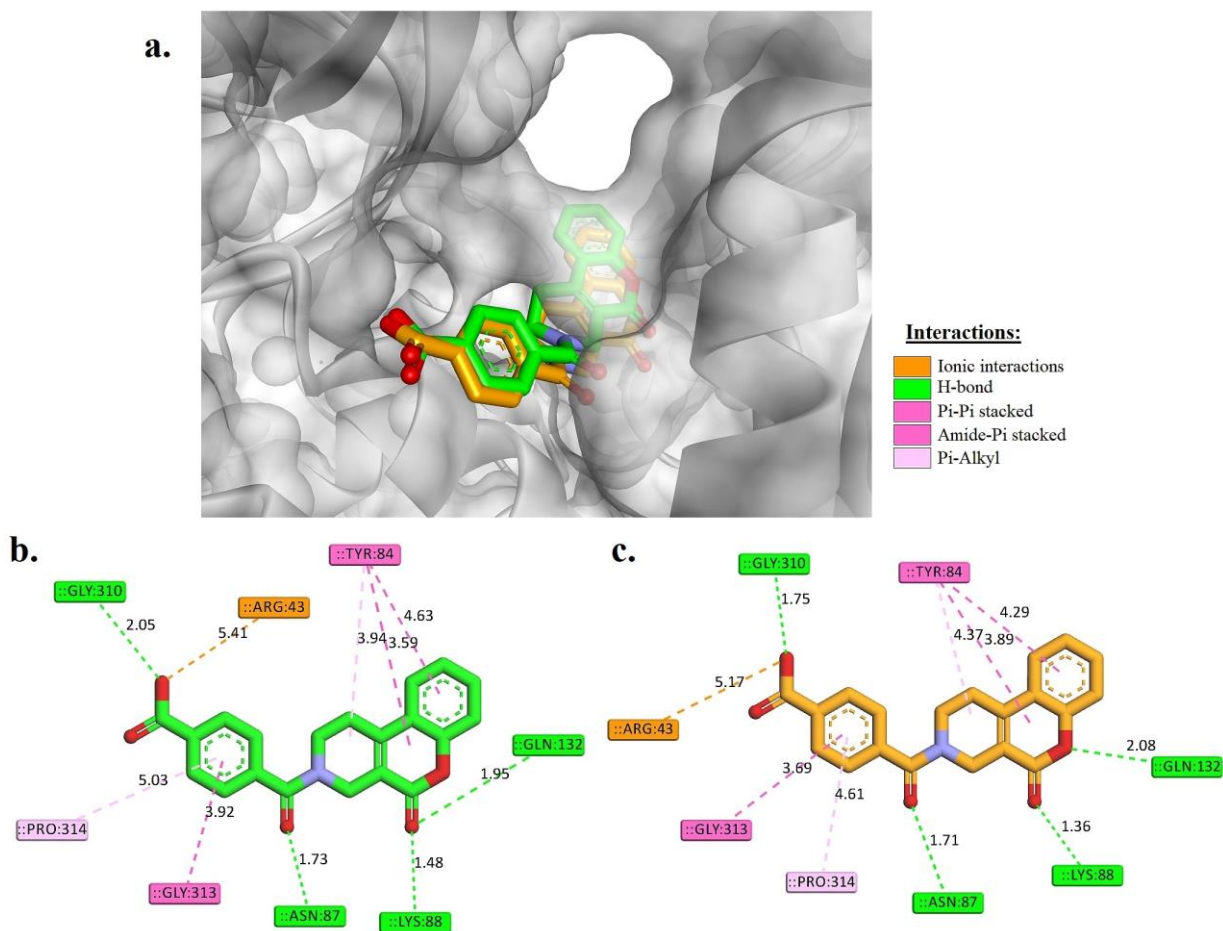

**Figure S1.** (a.) Superimposition and (b.) 2D interaction analysis of the co-crystallized ligand (DS44960156) (highlighted in green for carbon (C), red for oxygen (O), and navy for nitrogen (N)). (c.) Re-docked ligand (highlighted in orange for carbon (C), red for oxygen (O), and navy for nitrogen (N)) within the crystal structure of the human MTHFD2 enzyme (PDB ID: 6JIB).
